# Supplementary material for: Highly efficient conversion of xylose to ethanol without glucose repression by newly isolated thermotolerant Spathaspora passalidarum CMUWF1–2
Source: PubMed Central journal article supplement (PMC6043994; doi:10.1186/s12866-018-1218-4), 2018-07-13
Supplement: 12866_2018_1218_MOESM1_ESM.pdf [file 12866_2018_1218_MOESM1_ESM.pdf]

**Table S1.** Xylose-utilizing yeasts isolated from natural samples and its sources

| No. | Isolates  | Types of samples | Sources                        |
|-----|-----------|------------------|--------------------------------|
| 1   | CMUMY1-P1 | Rotten pineapple | Muang District, Chiang Rai     |
| 2   | CMUMY1-P3 | Rotten pineapple | Muang District, Chiang Rai     |
| 3   | CMUMY1-P4 | Rotten pineapple | Muang District, Chiang Rai     |
| 4   | CMUMY2-P1 | Rotten pineapple | Muang District, Chiang Rai     |
| 5   | CMUMY2-P2 | Rotten pineapple | Muang District, Chiang Rai     |
| 6   | CMUMY3-4  | Decayed wood     | Muang District, Chiang Rai     |
| 7   | CMUMY3-5  | Decayed wood     | Muang District, Chiang Rai     |
| 8   | CMUWF1-2  | Soil             | Mae Taeng District, Chiang Mai |
| 9   | CMUWF2-2  | Soil             | Mae Taeng District, Chiang Mai |
| 10  | CMULP5    | Soil             | Muang District, Chiang Mai     |
| 11  | CMULP6    | Soil             | Muang District, Chiang Mai     |
| 12  | CMULP7    | Soil             | Muang District, Chiang Mai     |
| 13  | CMUF1     | Soil             | Muang District, Chiang Mai     |
