# Supplementary material for: Highly efficient conversion of xylose to ethanol without glucose repression by newly isolated thermotolerant Spathaspora passalidarum CMUWF1–2
Source: PubMed Central journal article supplement (PMC6043994; doi:10.1186/s12866-018-1218-4), 2018-07-13
Supplement: 12866_2018_1218_MOESM3_ESM.pdf [file 12866_2018_1218_MOESM3_ESM.pdf]

**Table S2.** Parameters in YP medium containing a single sugar at various temperatures under a shaking condition (160 rpm)

| Medium | Temp (°C) | $\mu_{x,s}$ (h <sup>-1</sup> ) at 12 h | $\gamma_s$ (g/l·h) at 12 h |
|--------|-----------|----------------------------------------|----------------------------|
| YPD    | 30        | 1.09 ± 0.23                            | 0.68 ± 0.28                |
|        | 37        | 1.12 ± 0.09                            | 0.71 ± 0.25                |
|        | 40        | 0.30 ± 0.01                            | 0.10 ± 0.08                |
| YPMan  | 30        | 0.77 ± 0.26                            | 0.34 ± 0.23                |
|        | 37        | 0.83 ± 0.23                            | 0.57 ± 0.26                |
|        | 40        | 0.33 ± 0.13                            | 0.14 ± 0.11                |
| YPGal  | 30        | 0.64 ± 0.02                            | 0.31 ± 0.23                |
|        | 37        | 0.48 ± 0.30                            | 0.26 ± 0.11                |
|        | 40        | 0.18 ± 0.12                            | 0.15 ± 0.08                |
| YPXyl  | 30        | 0.47 ± 0.03                            | 0.17 ± 0.15                |
|        | 37        | 0.38 ± 0.21                            | 0.15 ± 0.03                |
|        | 40        | 0.13 ± 0.07                            | 0.07 ± 0.05                |
| YPAra  | 30        | 0.26 ± 0.02                            | 0.03 ± 0.05                |
|        | 37        | 0.17 ± 0.06                            | 0.06 ± 0.06                |
|        | 40        | 0.07 ± 0.03                            | 0.01 ± 0.01                |

$\mu_{x,s}$ , Specific growth rate;  $\gamma_s$ , Specific sugar utilization rate; ±, S.D. from three independent experiments
