# Supplementary material for: Highly efficient conversion of xylose to ethanol without glucose repression by newly isolated thermotolerant Spathaspora passalidarum CMUWF1–2
Source: PubMed Central journal article supplement (PMC6043994; doi:10.1186/s12866-018-1218-4), 2018-07-13
Supplement: 12866_2018_1218_MOESM4_ESM.pdf [file 12866_2018_1218_MOESM4_ESM.pdf]

**Table S3.** Parameters in YP medium containing mixed sugars with Glc at various temperatures under a shaking condition (160 rpm)

| Medium  | Temp (°C) | $\mu_{x/s}$ (h <sup>-1</sup> ) at 12 h | $\gamma_s$ (g/l h) at 12 h |
|---------|-----------|----------------------------------------|----------------------------|
| YPDMan  | 30        | 1.08 ± 0.25                            | Glc 0.51 ± 0.12            |
|         |           |                                        | Man 0.10 ± 0.09            |
|         | 37        | 1.00 ± 0.02                            | Glc 0.59 ± 0.04            |
|         |           |                                        | Man 0.23 ± 0.08            |
|         | 40        | 0.20 ± 0.10                            | Glc 0.03 ± 0.07            |
|         |           |                                        | Man 0.02 ± 0.02            |
| YPDGal  | 30        | 1.07 ± 0.20                            | Glc 0.72 ± 0.15            |
|         |           |                                        | Gal 0.01 ± 0.05            |
|         | 37        | 1.03 ± 0.07                            | Glc 0.67 ± 0.11            |
|         |           |                                        | Gal 0.01 ± 0.01            |
|         | 40        | 0.19 ± 0.10                            | Glc 0.08 ± 0.06            |
|         |           |                                        | Gal 0.01 ± 0.01            |
| YPDXyl  | 30        | 1.06 ± 0.39                            | Glc 0.72 ± 0.31            |
|         |           |                                        | Xyl 0.02 ± 0.02            |
|         | 37        | 0.95 ± 0.06                            | Glc 0.76 ± 0.10            |
|         |           |                                        | Xyl 0.08 ± 0.07            |
|         | 40        | 0.19 ± 0.09                            | Glc 0.13 ± 0.09            |
|         |           |                                        | Xyl 0.03 ± 0.02            |
| YPD Ara | 30        | 1.02 ± 0.35                            | Glc 0.75 ± 0.22            |
|         |           |                                        | Ara 0.08 ± 0.09            |
|         | 37        | 1.07 ± 0.04                            | Glc 0.75 ± 0.15            |
|         |           |                                        | Ara 0.00 ± 0.04            |
|         | 40        | 0.22 ± 0.12                            | Glc 0.14 ± 0.03            |
|         |           |                                        | Ara 0.01 ± 0.01            |

$\mu_{x,s}$ , Specific growth rate;  $\gamma_s$ , Specific sugar utilization rate; ±, S.D. from three independent experiments
