# Supplementary material for: Highly efficient conversion of xylose to ethanol without glucose repression by newly isolated thermotolerant Spathaspora passalidarum CMUWF1–2
Source: PubMed Central journal article supplement (PMC6043994; doi:10.1186/s12866-018-1218-4), 2018-07-13
Supplement: 12866_2018_1218_MOESM5_ESM.pdf [file 12866_2018_1218_MOESM5_ESM.pdf]

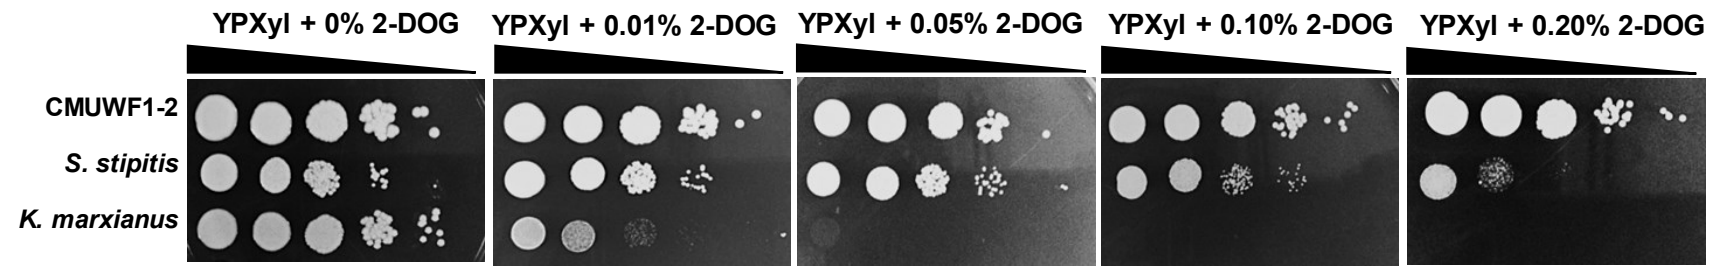

Figure S2.
