# Supplementary material for: Highly efficient conversion of xylose to ethanol without glucose repression by newly isolated thermotolerant Spathaspora passalidarum CMUWF1–2
Source: PubMed Central journal article supplement (PMC6043994; doi:10.1186/s12866-018-1218-4), 2018-07-13
Supplement: 12866_2018_1218_MOESM8_ESM.pdf [file 12866_2018_1218_MOESM8_ESM.pdf]

**Table S4.** Comparison of xylose fermentation data in this study with those reported previously in *S. passalidarum* strains.

| Strains                                                                                                      | Temp. (°C)                                                            | Conditions                                                       | Substrate conc. (g/l)                                            | Time (h) <sup>a</sup> | EtOH production (g/l) | EtOH Yield (g/g) | Xylitol production (g/l) | Reference  |
|--------------------------------------------------------------------------------------------------------------|-----------------------------------------------------------------------|------------------------------------------------------------------|------------------------------------------------------------------|-----------------------|-----------------------|------------------|--------------------------|------------|
| <i>S. passalidarum</i> CMUWF1-2                                                                              | 30                                                                    | Flask (WV 100 ml in 300 ml flask, 160 rpm)                       | (20) xylose                                                      | 24                    | 8.36 ± 0.22           | 0.43 ± 0.03      | 0.03                     | This study |
|                                                                                                              |                                                                       |                                                                  | (20) glucose + (20) xylose                                       | 24                    | 16.5 ± 0.75           | 0.42 ± 0.03      | 0.51                     |            |
|                                                                                                              | (20) xylose                                                           |                                                                  | 24                                                               | 6.77 ± 0.38           | 0.40 ± 0.04           | 0.19             |                          |            |
|                                                                                                              | (20) glucose + (20) xylose                                            |                                                                  | 36                                                               | 16.0 ± 0.44           | 0.39 ± 0.02           | 0.87             |                          |            |
|                                                                                                              | (20) xylose                                                           |                                                                  | 48                                                               | 3.90 ± 2.46           | 0.20 ± 0.12           | 0.43             |                          |            |
|                                                                                                              | (20) glucose + (20) xylose                                            |                                                                  | 60                                                               | 11.7 ± 1.57           | 0.33 ± 0.04           | 0.37             |                          |            |
| <i>S. passalidarum</i> ATCC MYA-4345                                                                         | 25                                                                    | Bioreactor (WV 2,000 ml)                                         | (40) xylose + (60) cellobiose                                    | 68                    | ~38.0                 | 0.43             | n                        | [1]        |
|                                                                                                              |                                                                       |                                                                  | (40) glucose + (40) xylose+ (20) cellobiose                      | 68                    | ~40.0                 | 0.42             | n                        |            |
|                                                                                                              | 32                                                                    | Anaerobic vials (WV 50 ml in 100 ml, 120 rpm)                    | (30) xylose + (30) glucose                                       | 96                    | ~28.0                 | n                | n                        | [2]        |
|                                                                                                              |                                                                       | Flask (WV 50 ml in 100 ml flask, 120 rpm)                        | (30) xylose + (30) glucose                                       | 24                    | ~25.0                 | n                | n                        |            |
|                                                                                                              | 25                                                                    | Flask (WV 70 ml in 125 ml flask, 110 rpm)                        | (150) xylose                                                     | 120                   | ~56.0                 | 0.45             | 0.80 – 1.40              | [3]        |
|                                                                                                              |                                                                       |                                                                  | (120) xylose + (30) glucose                                      | 120                   | 58.3                  | 0.43             | 2.90 – 3.80              |            |
|                                                                                                              | 30                                                                    | Flask (WV 100 ml in 250 ml flask with cotton plugged)            | (40–50) xylose                                                   | 18                    | 20.3 ± 0.20           | 0.48             | 0.60 ± 0.00              | [4]        |
|                                                                                                              |                                                                       |                                                                  | Flask (WV 100 ml in 100 ml flask with rubber plugged and needle) | (40–50) xylose        | 24                    | 20.5 ± 0.10      | 0.48                     |            |
| 27                                                                                                           | Bioreactor-sequential fed batch cell recycle (WV 700 ml) <sup>b</sup> | Sugarcane bagasse hydrolysate (42.9) glucose + (14.9) xylose     | 24                                                               | 23.3                  | 0.46                  | 0.67             | [5]                      |            |
| <i>S. passalidarum</i> UFMG-HMD-1.1, UFMG-HMD-1.3, UFMG-HMD-2.1, UFMG-HMD-10.2, UFMG-HMD-14.1, UFMG-HMD-16.2 | 30                                                                    | Flask: (WV 50 mL in 125 ml flasks)                               | (50) xylose                                                      | 24                    | 15.0 - 18.0           | 0.31 - 0.37      | 1.00 - 2.20              | [6]        |
| <i>S. passalidarum</i> UFMG-CM-Y469                                                                          | 30                                                                    | Flask (WV 100 ml in 250 ml flask with cotton plugged)            | (40–50) xylose                                                   | 18                    | 20.2 ± 0.10           | 0.47             | 1.10 ± 0.00              | [4]        |
|                                                                                                              |                                                                       | Flask (WV 100 ml in 100 ml flask with rubber plugged and needle) | (40–50) xylose                                                   | 24                    | 20.5 ± 0.60           | 0.48             | 1.40 ± 0.01              |            |
| <i>S. passalidarum</i> P16-1.1, G13-2.1, G13-3.8, G14-1.8, G14-2.2 and G18-3.7                               | 28                                                                    | Flask (50 ml WV in 125 ml flask, 120 rpm)                        | (40) xylose                                                      | 30                    | 17.9 - 18.9           | 0.42 - 0.45      | ND                       | [7]        |

<sup>a</sup> cultivation times that required for reaching the maximum values or cultivation time of the end of the fermentation experiment; <sup>b</sup> Results for the best fermentation (fourth fed batch); WV, working volume, n; data not available or not tested; ND, not detected

1. Long TM, Su YK, Headman J, Higbee A, Willis LB, Jeffries TW: Cofermentation of glucose, xylose, and cellobiose by the beetle-associated yeast *Spathaspora passalidarum*. *Appl Environ Microbiol* 2012, 78(16): 5492-5500.
2. Hou X: Anaerobic xylose fermentation by *Spathaspora passalidarum*. *Appl Microbiol Biotechnol* 2012, 94(1):205-214.
3. Su YK, Willis LB, Jeffries TW: Effects of aeration on growth, ethanol and polyol accumulation by *Spathaspora passalidarum* NRRL Y-27907 and *Scheffersomyces stipitis* NRRL Y-7124. *Biotechnol Bioeng* 2015, 112(3): 457-469.
4. Cadete RM, de Las Heras AM, Sandstrom AG, Ferreira C, Girio F, Gorwa-Grauslund MF, Rosa CA, Fonseca C: Exploring xylose metabolism in *Spathaspora* species: XYL1.2 from *Spathaspora passalidarum* as the key for efficient anaerobic xylose fermentation in metabolic engineered *Saccharomyces cerevisiae*. *Biotechnol Biofuels* 2016, 9: 167.
5. Nakanishi SC, Soares LB, Biazi LE, Nascimento VM, Costa AC, Rocha GJM, Ienczak JL: Fermentation strategy for second generation ethanol production from sugarcane bagasse hydrolyzate by *Spathaspora passalidarum* and *Scheffersomyces stipitis*. *Biotechnol Bioeng* 2017, 114(10): 2211-2221.
6. Cadete RM, Melo MA, Dussan KJ, Rodrigues RC, Silva SS, Zilli JE, Vital MJ, Gomes FC, Lachance MA, Rosa CA: Diversity and physiological characterization of D-xylose-fermenting yeasts isolated from the Brazilian Amazonian Forest. *PLoS One* 2012, 7 (8):e43135.
7. Souza GdF, Leite a, Valentim LTCN, Nogueira SRP, Abegg MA: Efficient production of second generation ethanol and xylitol by yeasts from Amazonian beetles (Coleoptera) and their galleries. *Afr J Microbiol Res*. 2017, 11(20): 814-824.
